1 **Title: The impact of ischemic stroke on connectivity gradients**

2

3 **Authors:**

4 Şeyma Bayrak<sup>1,2</sup>, Ahmed A. Khalil<sup>1,3,4</sup>, Kersten Villringer<sup>3</sup>, Jochen B. Fiebach<sup>3</sup>, Arno  
5 Villringer<sup>1,2,3,4</sup>, Daniel S. Margulies<sup>5</sup>, Smadar Ovadia-Caro<sup>1,4,6</sup>

6

7 **Affiliations:**

8 1. Department of Neurology, Max Planck Institute for Human Cognitive and Brain  
9 Sciences, Leipzig, Germany

10 2. Department of Cognitive Neurology, University Hospital Leipzig and Faculty of  
11 Medicine, University of Leipzig, Leipzig, Germany

12 3. Center for Stroke Research Berlin, Charité - Universitätsmedizin Berlin, Berlin,  
13 Germany

14 4. Berlin School of Mind and Brain, Humboldt-Universität zu Berlin, Berlin,  
15 Germany

16 5. Centre National de la Recherche Scientifique (CNRS) UMR 7225, Frontlab,  
17 Institut du Cerveau et de la Moelle épinière, Paris, France

18 6. Department of Neurology, Campus Benjamin Franklin, Charité -  
19 Universitätsmedizin Berlin, Berlin, Germany

20

21 **Correspondence:**

22 smadar.ovadia@gmail.com

23 Department of Neurology, Max-Planck Institute for Human Cognitive and Brain Sciences,  
24 Stephanstrasse 1, 04103, Leipzig, Germany.

25

26 daniel.margulies@gmail.com

27 Institut du Cerveau et de la Moelle épinière

28 Hôpital Pitié-Salpêtrière

29 47, boulevard de l'Hôpital

30 75013 Paris, France

31

32 **Keywords:** connectivity gradients, intrinsic functional connectivity, diaschisis, resting-state

33 fMRI, connectome, diffusion embedding

34

35 **Abstract**

36 Understanding the relationship between localized anatomical damage, reorganization, and  
37 functional deficits is a major challenge in stroke research. Previous work has shown that  
38 localized lesions cause widespread functional connectivity alterations in structurally intact  
39 areas, thereby affecting a whole network of interconnected regions. Recent advances suggest  
40 an alternative to discrete functional networks by describing a connectivity space based on a  
41 low-dimensional embedding of the full connectivity matrix. The dimensions of this space,  
42 described as *connectivity gradients*, capture the similarity of areas' connections along a  
43 continuous space. Here, we defined a three-dimensional connectivity space template based on  
44 functional connectivity data from healthy controls. By projecting lesion locations into this  
45 space, we demonstrate that ischemic strokes resulted in dimension-specific alterations in  
46 functional connectivity over the first week after symptoms onset. Specifically, changes in  
47 functional connectivity were captured along connectivity Gradients 1 and 3. The degree of  
48 change in functional connectivity was determined by the distance from the lesion along these  
49 connectivity gradients regardless of the anatomical distance from the lesion. Together, these  
50 results provide a novel framework to study reorganization after stroke and suggest that, rather  
51 than only impacting on anatomically proximate areas, the indirect effects of ischemic strokes  
52 spread along the brain relative to the space defined by its connectivity.

## 53 1.1 Introduction

54

55 Stroke is defined as a sudden neurological deficit caused by a localized injury to the central  
56 nervous system due to vascular pathology (Sacco et al., 2013). Outside of the localized  
57 structural damage, areas connected to the lesion undergo functional alterations that are  
58 implicated in symptomology and the recovery from neurological deficits. This phenomenon is  
59 known as *diaschisis* (Andrews, 1991; Carrera and Tononi, 2014) and provides a theoretical and  
60 empirical motivation to study brain connectivity following stroke.

61

62 Functional connectivity based on the temporal correlation of ongoing blood-oxygen-level-  
63 dependent (BOLD) fluctuations (resting-state functional magnetic resonance imaging; rs-  
64 fMRI) has been successfully used to study alterations associated with reorganization within  
65 functional networks. Previous studies found a reduction in functional connectivity after stroke  
66 in structurally intact areas connected to the lesion (i.e., the affected network). Reduction in  
67 functional connectivity was associated with the severity of the clinical deficit and recovery of  
68 symptoms (Baldassarre et al., 2014; Carter et al., 2010; He et al., 2007; Ovadia-Caro et al.,  
69 2013; Siegel et al., 2016; Wang et al., 2010; Warren et al., 2009). Importantly, normalization  
70 of connectivity patterns was found following both spontaneous recovery (He et al., 2007; Park  
71 et al., 2011; Ramsey et al., 2016; van Meer et al., 2010) and interventions using non-invasive  
72 brain stimulation (Volz et al., 2016). Taken together, these findings support the phenomenon  
73 of *diaschisis* and the view of stroke as a *network disruption* rather than a mere localized  
74 phenomenon (Corbetta, 2010; Ovadia-Caro et al., 2014; Ward, 2005).

75

76 While previous studies demonstrate the role of the affected network in stroke pathology, the  
77 impact of a lesion is not necessarily limited by network definitions. Graph models of brain  
78 connectivity have demonstrated that the local disruption of a single node is likely to extend  
79 beyond the affected network and impact, to varying degrees, the whole graph (Aerts et al., 2016;  
80 Bassett and Bullmore, 2006; van den Heuvel and Sporns, 2013). Using predefined functional  
81 networks assumes sharp boundaries between different functional domains. In addition, it  
82 assumes that the effects of stroke are uniformly distributed within a given network. Contrary to  
83 these assumptions, recent studies report that connectivity may be better captured by dimensions  
84 representing the continuous space of the connectome (Atasoy et al., 2016; Cerliani et al., 2012;  
85 Haak et al., 2018). With the shift in our understanding of cognitive brain functions as emerging  
86 from global states (Bertolero et al., 2018; Cole et al., 2014; Sporns et al., 2005), so too our

87 models of brain dysfunction should attempt to characterize alterations at the whole-brain level,  
88 taking the full connectome into account (see Figure 1).

89

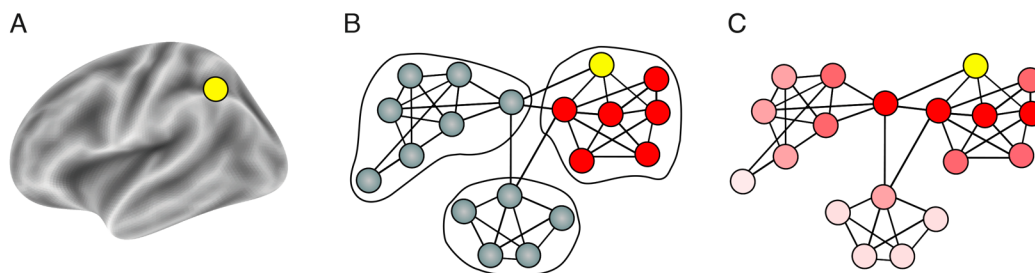

90

91 **Figure 1. Two complementary views on brain organization and the corresponding**  
92 **representation of distal effects of focal lesions.** (A) Representing a focal lesion (yellow node)  
93 on the brain anatomical surface. (B) A schematic description of discrete networks parcellation  
94 superimposed on a functional connectivity graph-space with nodes and edges. Using this  
95 approach to study the effects of focal lesions (yellow node) restricts us to singular networks.  
96 Additionally, distal effects of the lesion are assumed to be equally disruptive for all nodes in  
97 the affected network (red nodes). (C) Representing functional connectivity in a continuous  
98 manner without sharply defined borders using connectivity gradients. The lesioned node affects  
99 all other nodes in the system as a function of the distance from the lesion in graph space (dark  
100 red to light red). Using this approach does not assume sharp boundaries between functional  
101 networks and provides a more realistic model of distant effects of localized lesions.

102

103

104 Recently, non-linear decomposition approaches have been introduced to represent whole-brain  
105 rs-fMRI connectivity data in a continuous, low-dimensional space. This data-driven analysis  
106 results in *connectivity gradients* that provide a low-dimensional description of the connectome  
107 (Langs et al., 2016, 2014; Margulies et al., 2016). Each voxel is located along a connectivity  
108 gradient according to its similarity of connections. Voxels that share a similar pattern of  
109 functional connectivity are situated close to one another along a given connectivity gradient  
110 (Huntenburg et al., 2018). Different functional modules are therefore clustered along a  
111 continuum of a given connectivity gradient (Krienen and Sherwood, 2017) without the need of  
112 a priori defined network parcellation.

113

114 Here, we studied the impact of localized lesions on continuous connectivity gradients.  
115 Longitudinal rs-fMRI data were collected from patients following ischemic stroke. Data were  
116 collected within 24 hours, as well as one and five days after the onset of stroke symptoms.  
117 Changes in functional connectivity over the week were quantified using spatial concordance  
118 (Lohmann et al., 2012). Data from healthy subjects were used to create a template of three  
119 connectivity gradients representing all possible connections in a continuous manner.

120

121 Based on previous findings in discrete networks (Baldassarre et al., 2014; Carter et al., 2010;  
122 He et al., 2007; Nomura et al., 2010; Ovadia-Caro et al., 2013; Siegel et al., 2016; Wang et al.,  
123 2010; Warren et al., 2009) and computational models (Alstott et al., 2009; Honey and Sporns,  
124 2008; van Dellen et al., 2013; Young et al., 2000), we hypothesized that a lesion along a  
125 connectivity gradient would induce a gradual impact on the whole connectome. Functional  
126 connectivity alterations would be most pronounced in areas that share a similar connectivity  
127 pattern with the lesion.

128

## 129 **2.1 Materials and methods**

130

### 131 **2.2 Participants**

132

133 Fifty-four stroke patients (20 females, age:  $63.78 \pm 12.03$  years, mean  $\pm$  SD) and 31 healthy  
134 controls (13 females, age:  $64.90 \pm 8.49$  years) were initially recruited for the study. Inclusion  
135 criteria for patients were: patients older than 18 years, first ever ischemic stroke – small cortical  
136 ( $\leq 1.5$  cm) or subcortical, which was evident in imaging. A Wahlund score  $\leq 10$  (Wahlund et  
137 al., 2001) to limit the extent of white matter lesions. Exclusion criteria included: clinical  
138 evidence for antecedent lesions (n=3), fewer than 3 resting-state scans post-stroke (n=10),  
139 lesions located solely within white matter (n=3 patients), corrupted MRI raw data or distorted  
140 images (n=1 control, n=4 patients), high degree of head motion (n=1 control, n=6 patients), and  
141 poor registration quality (n=1 control). For further details on quality assessment see  
142 Supplementary Material M1.

143

144 Following the exclusion procedure, 28 stroke patients (11 females, age:  $65.04 \pm 13.27$  years,  
145 mean  $\pm$  SD), and 28 healthy controls (13 females, age:  $65.21 \pm 8.84$  years) were included in  
146 the analysis. The groups were matched for age and sex (age: Welch's t-test,  $P=0.95$ ; sex:  
147 Kruskal-Wallis H-test,  $P=0.59$ ). For further details on patients' information see Supplementary  
148 Table 1. The study was approved by the ethics committee of the Charité - Universitätsmedizin  
149 Berlin, Germany (EA 1/200/13). Written informed consent was obtained from all participants.

150

### 151 **2.3 Neuroimaging data**

152

153 The MRI protocol included T1-weighted structural scans and T2\*-weighted resting-state fMRI  
154 scans (continuous fMRI scan with no overt task) for all participants. In addition, diffusion

155 weighted images (DWI; TR=8.2 s, TE=0.1 s, 50 volumes, voxel size: 2×2×2.5 mm, flip angle  
156 90°) and fluid attenuated inversion recovery images (FLAIR; TR=8.0 s, TE=0.1 s, 54 volumes,  
157 voxel size: 0.5×0.5×5 mm) were acquired from the stroke patients as part of a standard MRI  
158 protocol (Hotter et al., 2009). All MRI data were acquired on a Siemens Tim Trio 3T scanner.  
159 Healthy control participants were scanned at a single time point, whereas stroke patients were  
160 scanned at three consecutive time points relative to stroke symptoms onset: day 0 (within 24  
161 hours), day 1 (24 - 48 hours), and day 5 (range: day 4 – 6, mean  $4.93 \pm 0.38$  SD). Structural  
162 scans were acquired using a three-dimensional magnetization prepared rapid gradient-echo  
163 (MPRAGE) sequence (TR=1.9 s, TE=2.52 s, TI=0.9 s, 192 slices, voxel size: 1×1×1 mm, flip  
164 angle 9°). Resting-state functional scans for each participant and session were acquired using  
165 blood-oxygenation-level-dependent (BOLD) contrast with an EPI sequence (TR=2.3 s,  
166 TE=0.03 s, 34 slices, 150 volumes, voxel size: 3×3×3 mm, flip angle 90°, total duration=5.75  
167 min).

168

## 169 **2.4 Data preprocessing**

170

171 T1-weighted structural images were preprocessed using FreeSurfer's recon-all pipeline (v6.0.0,  
172 (Dale et al., 1999)). The pipeline generated segmentations for grey matter, white matter and  
173 cerebrospinal fluid. Individual grey matter masks were registered to standard MNI space (3  
174 mm<sup>3</sup>).

175

176 Preprocessing of functional images included: *i*) removal of the first 5 EPI volumes to avoid  
177 signal saturation, *ii*) slice timing and motion correction (Nipype v0.14.0, (Gorgolewski et al.,  
178 2011; Roche, 2011)), *iii*) CompCor denoising approach for time series at the voxel level  
179 (Nilearn v0.4.0, (Behzadi et al., 2007)), *iv*) temporal normalization, *v*) band-pass filtering in the  
180 range of 0.01 - 0.1 Hz, and *vi*) spatial smoothing (applied after registration) with a 6 mm full-  
181 width-half maximum Gaussian kernel using FSL (v5.0.9, (Woolrich et al., 2009)). Confounds  
182 removed from the time series at the denoising step were defined as *i*) six head motion  
183 parameters, including 1st and 2nd order derivatives, *ii*) motion and intensity outliers (Nipype's  
184 rapidart algorithm; thresholds: > 1mm framewise head displacement, and signal intensity > 3  
185 SD of global brain signal accordingly) and *iii*) signal from white matter and cerebrospinal fluid.

186

187 The transformation of functional images to MNI152 (3 mm<sup>3</sup>) space included a linear  
188 transformation from EPI to the high-resolution T1-weighted image using FreeSurfer's

189 boundary-based register tool with 6 degrees of freedom (Greve and Fischl, 2009) and a  
190 nonlinear transformation using ANTs (v2.1.0, (Avants et al., 2011)). The transformation  
191 matrices obtained from both steps were concatenated and applied to the functional image using  
192 a single interpolation.

193

## 194 **2.5 Lesion delineation**

195

196 Lesions were manually delineated by identifying areas of localized hyperintensity on day 0  
197 DWI images using the ITK-SNAP software (v3.4.0, (Yushkevich et al., 2006)). Delineations  
198 were guided by expert radiology reports and were approved by a radiology resident. All lesion  
199 masks were normalized to MNI152 (3 mm<sup>3</sup>) space (ANTs, nearest-neighbor interpolation).  
200 Individual lesion masks were smoothed in the atlas space using FSL's dilation tool with 3×3×3  
201 kernel, extending the mask by one voxel-size (v5.0.9, (Jenkinson et al., 2012)).

202

## 203 **2.6 Computing connectivity gradients by applying nonlinear decomposition to functional** 204 **connectivity data from healthy controls**

205

206 To create a mutual grey matter template to be used for decomposition analysis, individual grey  
207 matter masks and resting-state functional masks were averaged for all healthy controls to create  
208 a group mask. Averaged group maps were multiplied to create a mutual mask such that only  
209 grey matter voxels with fMRI signal would be included. The resulting template (33,327 voxels)  
210 was used to generate functional connectivity matrices from individual healthy controls.

211

212 Functional connectivity matrices (33,327×33,327 voxels) were computed using Pearson's  
213 correlation coefficient and were normalized using Fisher's z-transformation. An average  
214 functional connectivity matrix was computed across healthy controls and the averaged z-scores  
215 were transformed back to r-scores. Each row of the group-level functional connectivity matrix  
216 was thresholded at 90% of its r-scores. This yielded an asymmetric, sparse matrix. The pairwise  
217 cosine similarities of all rows were computed. By doing this, we obtained a non-negative and  
218 symmetric similarity matrix,  $L$  (values in [0, 1] range).

219

220 We implemented the diffusion embedding approach on the similarity matrix to obtain a low-  
221 dimensional representation of the whole-brain functional connectivity matrix (Coifman and  
222 Lafon, 2006; Langs et al., 2016), as done in Margulies et al., 2016. This approach resulted in



223 gradients of functional connectivity. Voxels along each gradient are assigned unitless  
224 embedding values. Along each gradient, voxels that share similar connectivity pattern have  
225 similar embedding values.

226

## 227 2.7 Mapping individual stroke lesions onto connectivity gradients from healthy controls

228

229 Individual lesion masks were projected onto the individual gradients obtained in healthy  
230 controls. Lesioned voxels were marked according to their location along a specific gradient.  
231 The lesion site along each gradient was defined as the minimum embedding value of all lesioned  
232 voxels.

233

234 To quantify the functional similarity of non-lesioned voxels to the lesion site, distance-to-lesion  
235 maps were computed for each non-lesioned voxel (Figure 2B). Distance values reflect the  
236 mutual difference between embedding values of non-lesioned and lesioned voxels. Low  
237 distance values reflect voxels that share similar functional connectivity pattern with the lesion  
238 site.

239

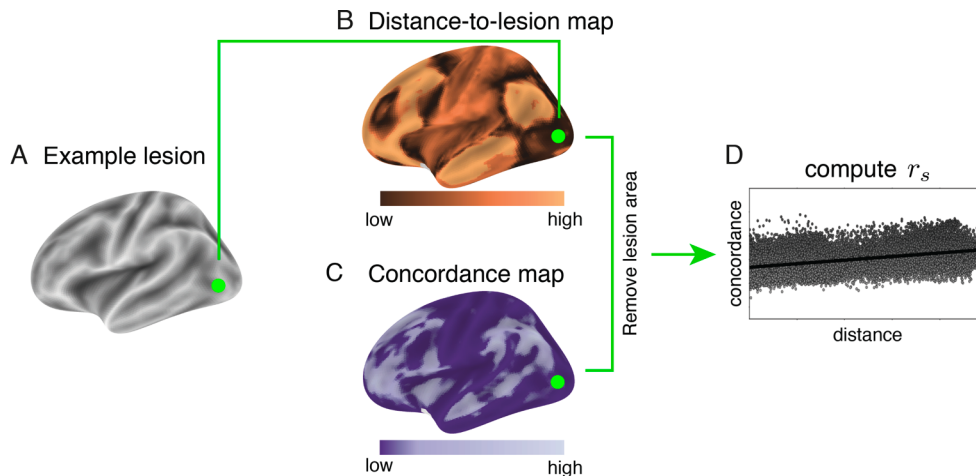

240

241 **Figure 2. A schematic description of the analysis steps.** (A) Individual lesions were  
242 delineated for each patient. Here, an example of a lesion located in the left occipital lobe  
243 (green). (B) Distance-to-lesion maps were computed for each of the three connectivity  
244 gradients. Distance values reflect the mutual difference between embedding values of non-  
245 lesioned and lesioned voxels. Low distances (dark-copper) represent voxels that share a similar  
246 functional connectivity pattern with the lesion site. This example shows the distance-to-lesion  
247 map for the first gradient. (C) A voxel-wise spatial concordance map was computed for each  
248 patient across the three resting-state scans after stroke. Concordance correlation coefficient  
249 (CCC) values reflect the degree of change in the connectivity pattern over time for each voxel.  
250 Low CCC values (dark-purple) represent voxels that underwent a larger change in their  
251 functional connectivity pattern over time. (D) Spearman's rank correlation coefficient ( $r_s$ ) was  
252 used to test the relationship between distance-to-lesion and degree of functional connectivity  
253 alteration across all voxels. A positive correlation depicts a larger change in functional



254 connectivity for voxels that were closer to the lesion site along the corresponding connectivity  
255 gradient.

256

## 257 **2.8 Quantifying longitudinal alterations in functional connectivity matrices for stroke** 258 **patients**

259

260 For each patient, a functional mask was obtained from each of the three consecutive functional  
261 scans. These masks were multiplied with the grey matter template of the healthy cohort. The  
262 dilated lesion segmentations were then excluded from the patient-specific grey matter template.  
263 This approach ensured that functional images of patients included only identical grey matter  
264 voxels as healthy controls, except for the lesion site. The patient-specific grey matter templates  
265 varied slightly in number of voxels included (ranging from 32,659 to 33,212 voxels).

266

267 To control for the slight variation in the number of voxels in patient-specific grey matter  
268 templates, a control analysis was applied such that the grey matter template used for the analysis  
269 contained 30,314 voxels in all patients prior to lesion removal. Using this more restricted mask  
270 had no influence on our main results (see Supplementary Material M2 and Supplementary  
271 Figure S1).

272

273 Functional connectivity matrices were computed using Pearson's correlation coefficient at each  
274 of the three time points for individual patients. The voxel-wise spatial concordance map was  
275 computed using the concordance correlation coefficient (CCC) (Lin, 2016) at the single-voxel  
276 level across the three time points (Lohmann et al., 2012). CCC-values range between -1 and 1,  
277 such that the lower concordance reflects larger alterations in the functional connectivity pattern  
278 over time (Figure 2C).

279

## 280 **2.9 The relationship between lesion location along connectivity gradients and alterations** 281 **in functional connectivity after stroke**

282

283 Concordance correlation coefficient (CCC) values were correlated with distance-to-lesion  
284 values using Spearman's rank-order correlation coefficient (Figure 2D). This analysis was  
285 repeated for each connectivity gradient separately. Positive correlations suggest that changes in  
286 functional connectivity are more pronounced in voxels that are close to the infarct region in the  
287 corresponding gradient.

288 For a detailed description of the analysis steps see Supplementary Figure S2.

## 289 **2.10 The relationship between changes in functional connectivity over time and** 290 **anatomical lesion location**

291  
292 Euclidean distances from each voxel to the infarct area in MNI152 (3 mm<sup>3</sup>) space using three-  
293 dimensional voxel coordinates were computed for each patient. The resulting anatomical  
294 distance values were correlated with concordance values (using Pearson's correlation  
295 coefficient). A regression analysis was applied to remove the contribution of this factor from  
296 CCC-values. Residuals were correlated with gradient-based distance-to-lesion values (using  
297 Spearman's rank-order correlation coefficient).

## 298 299 **2.11 The relationship between changes in functional connectivity along connectivity** 300 **gradients and changes in clinical scores**

301  
302 Individual gradients were divided into uniform parcels (bins). We varied the number of bins  
303 used for the parcellation from 5 to 3000 in order to consider the continuous nature of  
304 connectivity gradients while allowing us to classify parts of the gradients as affected by the  
305 lesion. At each bin number and for each stroke patient, bins that overlapped with lesioned-  
306 voxels were identified as "lesion-affected", whereas the remaining bins were defined as "lesion-  
307 unaffected". An overall delta-concordance measure,  $\Delta CCC$ , was computed as the difference  
308 between average concordances in lesion-unaffected and lesion-affected bins, such that  $\Delta CCC =$   
309  $\mu_{unaffected} - \mu_{affected}$ . A positive  $\Delta CCC$  score reflects a higher functional connectivity  
310 alteration over time in affected bins. Of note is that lesioned voxels were removed from this  
311 computation, thereby the difference in concordance reflects the degree of preferential change  
312 in functional connectivity in affected yet structurally intact areas.

313  
314 To explore the link between changes in clinical scores and the overall delta-concordance  
315 measure detected along gradients, the National Institute of Health Stroke Scale (NIHSS) was  
316 used. The NIHSS values were assessed at the day of admission (day 0) and discharge (day 5).  
317 Twenty-seven patients out of 28 completed the NIHSS assessment at both time points. Patients  
318 were divided into two groups; those who changed in clinical score from day 0 to day 5 ("clinical  
319 change", n = 16), and those who did not change ("no clinical change", n = 11).

320  
321 Permutation test (with 10,000 iterations) was used to examine the significance of the difference  
322 in mean  $\Delta CCC$  values for the two groups of patients ("clinical change" versus "no clinical

323 change”). The test was repeated for each variation of bin numbers as well as for each of the  
324 three connectivity gradients. Positive values reflect that a preferential change in concordance  
325 over affected bins is more pronounced in patients who changed their clinical score from day 0  
326 to day 5. To control for the multiple comparison problem resulting from varying the number of  
327 bins (N= 2996 tests), the False Discovery Rate (FDR) correction (Benjamini and Hochberg,  
328 1995) was applied with a threshold of 0.1.

329

### 330 **3.1 Results**

331

### 332 **3.2 Mapping stroke lesions onto connectivity gradients**

333

334 To map heterogeneous lesions across our sample of patients, individualized lesion masks were  
335 delineated and projected onto a standard MNI brain (Figure 3A), as well as onto the first three  
336 connectivity gradients (Figure 3B). Lesions were heterogeneous in both location and size (mean  
337 volume=4.11 cm<sup>3</sup>, SD=2.80 cm<sup>3</sup>), and distributed in subcortical (n=13), cortical (n=14), and  
338 brainstem (n=1) regions. For further details on individual lesion location and affected vascular  
339 territories, see Supplementary Table 1.

340

341 Projecting lesion locations onto the connectivity gradients enabled us to assess which portions  
342 of connectivity space were affected by the stroke. The template connectivity space was based  
343 on a decomposition of voxelwise functional connectivity data from healthy controls. Voxels  
344 that share functional connectivity patterns are situated closer to one another along a given  
345 connectivity gradient. For example, voxels that are part of the default-mode network are  
346 clustered at the high end of Gradient 1, and those that are part of primary sensory areas at the  
347 low end (Margulies et al., 2016). Here, we used the first three gradients that account for a total  
348 variance of 50.84% in the healthy control connectivity data (see Supplementary Figure S3).

349

350 Figure 3B demonstrates the distribution of lesioned voxels within the three-dimensional  
351 connectivity space. We found that although the anatomical location of lesions was  
352 heterogeneous (Figure 3A), within the connectivity space lesions were predominantly clustered  
353 at the extremes of each gradient, especially those of Gradients 1 and 3 (Figure 3B).

354

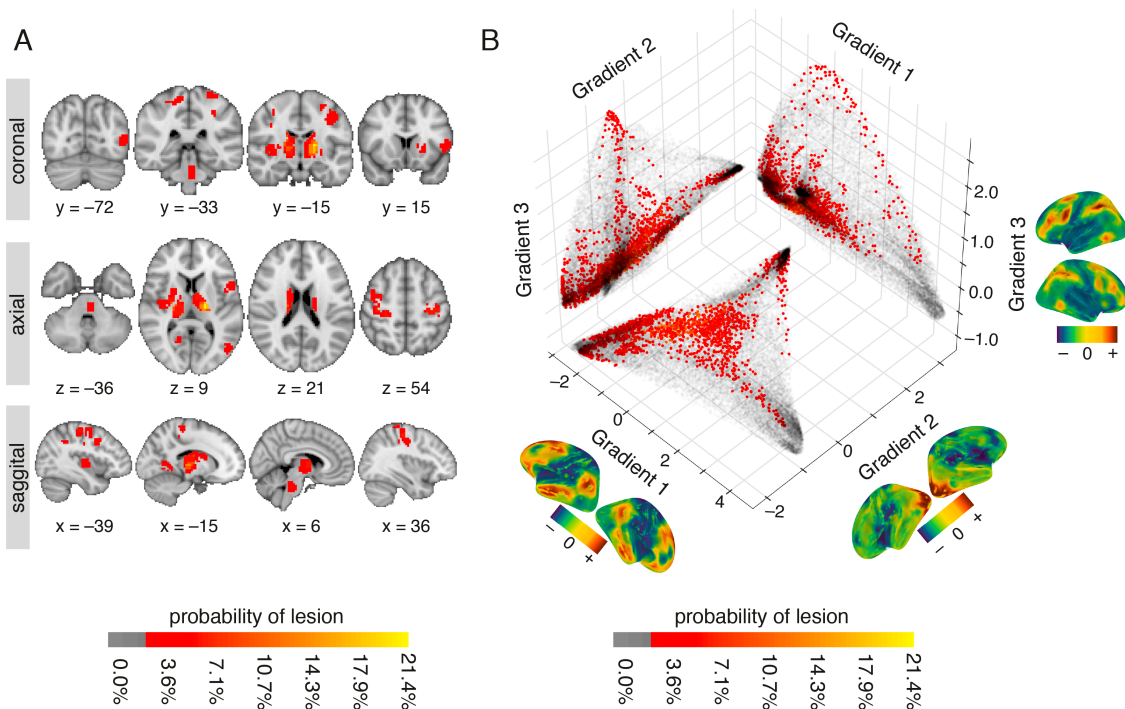

355

356

357 **Figure 3. Lesion location across patients shown in anatomical space and along**  
358 **connectivity gradients (A)** Anatomical lesion distribution in individual stroke patients (n=28)  
359 projected onto an MNI brain. The red-to-yellow color bar indicates the percentage of patients  
360 with lesions in that voxel. (B) Location of lesions projected onto the first three connectivity  
361 gradients. The three connectivity gradients represent a low-dimensional description of the  
362 whole-brain connectivity matrix obtained using healthy controls' data (n=28). Corresponding  
363 spatial maps of each connectivity gradient are projected on brain surface mesh near respective  
364 axes. Colors represent positive (sienna) and negative (dark blue) embedding values, in  
365 accordance with values along the axes. Along each gradient, voxels that share similar  
366 connectivity patterns are situated close to one another and have similar embedding values. Grey  
367 scatter plots depict a two-dimensional connectivity space created as a combination of any two  
368 given gradients. Lesion location along each gradient is projected onto the two-dimensional  
369 space as an alternative approach to anatomical lesion mapping. The red-to-yellow color bars  
370 indicate the percentage of patients with lesions in that voxel. Lesioned voxels are mostly  
371 clustered around the edges of the connectivity gradients such that they affect sensorimotor areas  
372 and ventral and dorsal areas associated with attention.

373

374

### 375 **3.3 The impact of lesion location along specific connectivity gradients on reorganization**

376

377 To determine if the location of lesions along specific gradients is associated with changes in  
378 functional connectivity after stroke, we computed for each voxel: 1) spatial concordance, which  
379 reflected the degree of change in the functional connectivity pattern over time. Spatial  
380 concordance values range between -1 and 1 such that lower values reflect a larger change in  
381 functional connectivity pattern over time; and, 2) distance-to-lesion along each connectivity  
382 gradient. Distance values represent the similarity of functional connectivity patterns for any

383 given voxel with the lesioned area. Low distance values reflect voxels that share similar  
384 functional connectivity pattern with the lesion site. Importantly, the lesioned voxels were  
385 excluded from both these analyses such that only the indirect effects of the lesion (i.e.,  
386 diaschisis) were assessed. Spatial concordance and distance-to-lesion were correlated for  
387 individual patients, and individual connectivity gradients.

388

389 We found a significant relationship between the degree of functional connectivity alterations  
390 over time and proximity of non-lesioned voxels to lesion locations along Gradient 1 and  
391 Gradient 3. No significant relationship was found for Gradient 2 (Figure 4A, Table 1).

392

393 Figure 4B demonstrates the correspondence between the connectivity space described by  
394 Gradients 1 and 3, and a canonical set of seven resting-state networks (Yeo et al, 2011).  
395 Gradient 1 captures the dissociation between the default-mode network (DMN) and the  
396 sensorimotor/visual networks, while Gradient 3 captures the dissociation between dorsal  
397 attention/fronto-parietal networks and sensorimotor/visual/DMN networks. For a descriptive  
398 analysis of the relationship between connectivity gradients and cognitive functions see  
399 Supplementary Material M3 and Supplementary Figure S4.

400

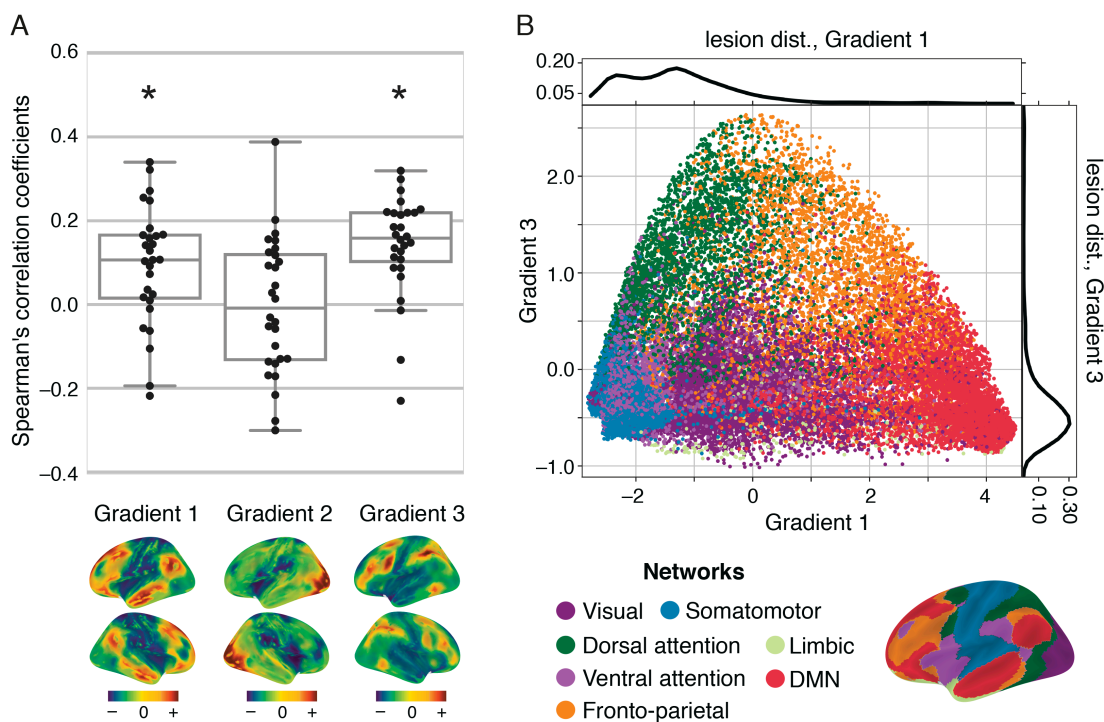

401

402 **Figure 4. The relationship between lesion location along connectivity gradients and the**  
403 **degree of changes in functional connectivity in non-lesioned voxels over time.** (A)  
404 Correlation values between distance-to-lesion and spatial concordance (y-axis) are shown for  
405 individual patients and the three connectivity gradients (x-axis). The spatial map of each

406 connectivity gradient is shown below the respective location on the x-axis. Correlations were  
407 significantly positive for Gradient 1 ( $P=0.0027$ ,  $W=71.0$ , one-tailed Wilcoxon signed-rank test)  
408 and Gradient 3 ( $P=0.0001$ ,  $W=35.0$ ), but not for Gradient 2 ( $P=0.76$ ,  $W=189.0$ ). The closer a  
409 voxel is to the lesioned site mapped on connectivity gradients 1 and 3, the more pronounced its  
410 functional connectivity changes over time. (B) Continuous connectivity gradients and  
411 corresponding seven canonical resting-state networks (Thomas Yeo et al., 2011). Voxels are  
412 situated based on their embedding values along Gradient 1 (x-axis) and 3 (y-axis) and colored  
413 according to their network assignment. Gradient 1 captures the dissociation between the  
414 default-mode network (DMN) and the sensorimotor networks on its two edges, while Gradient  
415 3 captures the dissociation between dorsal attention/fronto-parietal networks and  
416 sensorimotor/DMN networks on its two edges. Lesion distributions along connectivity  
417 gradients are overlaid on the individual gradient axes. Lesions overlap most frequently with the  
418 lowest ends of Gradients 1 and 3.  
419

|                 | <b>Gradient 1</b> | <b>Gradient 2</b> | <b>Gradient 3</b> |
|-----------------|-------------------|-------------------|-------------------|
| <b>r-values</b> | [-0.22, 0.34]     | [-0.30, 0.39]     | [-0.23, 0.32]     |
| <b>median</b>   | 0.11              | -0.01             | 0.16              |
| <b>W</b>        | 71.00             | 189.00            | 35.00             |
| <b>p-values</b> | 0.0027*           | 0.76              | 0.0001*           |

420

421 **Table 1: summary of statistical results**

422 W; Wilcoxon signed-rank test.

423

424 Given the expected partial correlation between distance from the lesion in connectivity space  
425 and anatomical distance, we further assessed whether anatomical location contributed to the  
426 relationship with connectivity space. We found a significant relationship between distance from  
427 the lesion in anatomical space and changes in functional connectivity over time ( $P = 0.0042$ ,  
428 one-tailed Wilcoxon signed-rank test). However, using anatomical distance as a regressor of no  
429 interest did not alter the significance of our main result (see Supplementary Figure S5).  
430 Functional connectivity therefore preferentially changes after stroke in voxels that are proximal  
431 to the lesion location along Gradients 1 and 3. This relationship cannot be solely explained by  
432 the anatomical distance from the lesion.

433

### 434 **3.4 Clinical relevance of functional connectivity alterations detected along connectivity** 435 **gradients**

436

437 Previous studies have linked alterations in functional connectivity with clinical trajectory (He  
438 et al., 2007; Ovadia-Caro et al., 2013; Park et al., 2011; Ramsey et al., 2016; van Meer et al.,  
439 2010), thereby supporting the functional significance of connectivity changes after stroke. We  
440 thus explored the relationship between functional connectivity changes and patients' clinical  
441 trajectory for each connectivity gradient.

442



443 We tested for a group difference in spatial concordance in affected yet structurally intact areas  
444 between patients who demonstrated a change in clinical scores from day 0 to day 5 and those  
445 who did not. A positive difference in the mean of the two groups reflects an association between  
446 preferential changes in functional connectivity in affected areas and a change in clinical scores  
447 over the first week after stroke. To maintain the continuous nature of connectivity gradients,  
448 we varied the number of bins used to divide the gradients into parcels of equal size (bin numbers  
449 ranged from 5 to 3000). We found no significant difference between patients who changed in  
450 clinical scores and those who did not for any of the connectivity gradients, across different bin  
451 numbers. The averaged difference in mean for the two groups was 0.0014 (range: -0.004 to  
452 0.015) for Gradient 1, 0.0095 (range: 0.003 to 0.015) for Gradient 2, and 0.011 (range: 0.0012  
453 – 0.019) for Gradient 3. The range of corresponding p-values was 0.15 to 0.61 for Gradient 1,  
454 0.12 to 0.4 for Gradient 2, and 0.03 to 0.46 for Gradient 3 (see Supplementary Figure S6).

455

#### 456 **4.1 Discussion:**

457

458 We found that stroke induces a gradual change in functional connectivity along specific  
459 connectivity gradients. Beginning with data acquired on the day of symptom onset, we showed  
460 that the degree of reorganization over the first week is influenced by the lesion location along  
461 connectivity Gradients 1 and 3. Voxels that are close to the lesion within this connectivity space  
462 demonstrate a preferential change in functional connectivity over time, regardless of their  
463 anatomical distance from the lesion.

464

465 We have implemented a decomposition approach that overcomes the necessity to parcellate the  
466 brain into discrete networks, retains information from single voxels and provides a data-driven  
467 template for studying reorganization at the connectome-level. We therefore show that strokes  
468 result in widespread connectivity changes that progress gradually along the connectome.

469

470 Our results are in line with previous studies that have used a priori defined networks. Functional  
471 connectivity alterations after stroke have been reported for sensorimotor, language and attention  
472 networks (Baldassarre et al., 2014; Carter et al., 2010; He et al., 2007; Ovadia-Caro et al., 2013;  
473 Siegel et al., 2016; Wang et al., 2010; Warren et al., 2009). These previous studies support the  
474 notion that localized lesions induce widespread effects in structurally intact areas connected to  
475 the lesion, creating a *diaschisis* effect (Andrews, 1991; Carrera and Tononi, 2014). Stroke is  
476 therefore not a strictly localized pathology (Corbetta, 2010; Ovadia-Caro et al., 2014; Ward,



477 2005). Remote, structurally intact areas undergo functional changes as part of the  
478 reorganization process.

479

480 Here, we extend these findings to the continuous representation of the connectome. We  
481 demonstrate that reorganization, as reflected in functional connectivity alterations, changes as  
482 a function of the distance along specific connectivity gradients. However, it is not exclusively  
483 restricted to the affected network. Thus, while most pronounced changes take place in  
484 connected areas, the effects of stroke gradually spread along the connectome.

485

486 We found that connectivity Gradients 1 and 3 better predicted the impact of a lesion on  
487 functional connectivity than Gradient 2. The three connectivity gradients capture distinct  
488 connectivity axes, with different functional domains on their extremes. One crucial difference  
489 between these gradients is that Gradient 2, in contrast to the others, represents a spectrum of  
490 relatively local patterns of connectivity (Felleman and Van Essen, n.d.; Markov et al., 2014),  
491 spanning sensory and motor systems. Regions emphasized in Gradient 2 are less likely to  
492 demonstrate changes following localized lesions, as there is little redundancy owing to long-  
493 distance connectivity. However, it remains to be investigated if changes in functional  
494 connectivity can be captured along Gradient 2 using a more homogenous lesion sample  
495 impacting only the far extremes of this gradient.

496

497 Our study demonstrates the importance of the lesion location within connectivity space for  
498 understanding the reorganization of functional connectivity. However, distance from the lesion  
499 in connectivity space is partially related to the anatomical distance, as areas close to one another  
500 often have similar connectivity patterns. In addition, local physiological changes in areas  
501 directly surrounding the lesion (Dirnagl et al., 1999) can also contribute to changes in functional  
502 connectivity (Khalil et al., 2017; Siegel et al., 2016). We therefore calculated in a control  
503 analysis the Euclidian distances from each voxel to the infarct area using a three-dimensional  
504 anatomical space. We found a significant relationship between distance based on anatomy and  
505 changes in functional connectivity as measured by spatial concordance. However, when  
506 regressing out the contribution of this factor from our main analysis, the results did not change  
507 (see Supplementary Figure S5). Consequently, changes in functional connectivity detected  
508 along connectivity gradients could not be solely explained by lesion topography or  
509 physiological processes occurring in the vicinity of the lesion site. In addition, this analysis

510 emphasizes the significant contribution of functional connectivity changes in distant areas to  
511 the global process of reorganization.

512

513 The link between changes in functional connectivity after stroke, clinical deficits and clinical  
514 recovery has been previously shown (He et al., 2007; Ovadia-Caro et al., 2013; Park et al.,  
515 2011; Ramsey et al., 2016; van Meer et al., 2010). Here, we applied an exploratory analysis of  
516 the relationship between lesion location along connectivity gradients, changes in functional  
517 connectivity, and changes in clinical scores (NIHSS) over the first week. We divided the  
518 patients into two groups according to whether or not a clinical change took place over the first  
519 week.

520

521 Given previous findings, we expected a significant difference between the groups in the degree  
522 of change in functional connectivity patterns, however, we found no such difference for any of  
523 the connectivity gradients. Of interest nevertheless is that for Gradient 2 and Gradient 3, group  
524 differences were not randomly distributed and were positive in values (see Supplementary  
525 Figure S6).

526

527 The lack of a relationship between changes in functional connectivity and changes in clinical  
528 scores could be explained by the usage of NIHSS. NIHSS is the most commonly used  
529 assessment scale in routine acute stroke management. However, this score is fairly coarse and  
530 is not designed to accurately detect individual neurological deficits. It is instead intended to  
531 provide a standardized and reproducible overall assessment of how stroke affects a patient's  
532 neurological status (Lyden, 2017). The relationship between functional connectivity changes  
533 along specific connectivity gradients and stroke symptomology assessed using a more detailed  
534 clinical assessment (which would better fit the voxelwise information retained in the gradients,  
535 particularly for parcellations that contain a small number of voxels) remains to be investigated  
536 in a larger sample of patients.

537

538 The conceptual shift from mapping brain regions to networks has provided a substantial  
539 improvement in how we understand the organization of functional systems. Here we aimed to  
540 translate the recent descriptions of a low-dimensional connectivity space to the clinical question  
541 of stroke-induced damage. While future studies will be necessary to better understand the utility  
542 of this framework for stroke prognosis, the current findings provide support for conceptualizing  
543 brain connectivity within a continuous connectivity-defined space. Brain networks describe

544 interconnected regions, but similar to the problem of lesion delineation, they also require the  
545 delineation of discrete boundaries. Connectivity space offers an advance by representing the  
546 continuous nature of brain networks, but also by capturing their relative similarity. Further work  
547 is necessary to develop a mode of describing this space in a cognitive and clinical neuroscience  
548 context. Nevertheless, the current findings demonstrate its utility for capturing the impact of  
549 localized damage to the space.

550

## 551 **5.1 Conclusions**

552

553 Studying changes in functional connectivity after stroke in a longitudinal manner provides  
554 insight into the process of reorganization during the recovery of function. Connectivity  
555 gradients represent a methodological advancement in how we depict functionally meaningful  
556 information in the connectome. Using this fine-grained template that considers all connections  
557 has the potential of informing more targeted stroke therapies that have yet to translate to clinical  
558 usage, mostly due to oversimplified models of brain reorganization (Di Pino et al., 2014).

559

560

## 561 **Acknowledgements:**

562 The authors would like to thank the patients for participating in the study, and to Dr. Julia  
563 Huntenburg, Dr. Luke Tudge and Sabine Oligschläger for their advice in various stages of this  
564 project.

565

566

567

568

569 **References:**

- 570 Aerts, H., Fias, W., Caeyenberghs, K., Marinazzo, D., 2016. Brain networks under attack:  
571 Robustness properties and the impact of lesions. *Brain* 139, 3063–3083.  
572 <https://doi.org/10.1093/brain/aww194>
- 573 Alstott, J., Breakspear, M., Hagmann, P., Cammoun, L., Sporns, O., 2009. Modeling the  
574 impact of lesions in the human brain. *PLoS Comput. Biol.* 5, e1000408.  
575 <https://doi.org/10.1371/journal.pcbi.1000408>
- 576 Andrews, R.J., 1991. Transhemispheric diaschisis. A review and comment. *Stroke* 22, 943–  
577 949. <https://doi.org/10.1161/01.STR.22.7.943>
- 578 Atasoy, S., Donnelly, I., Pearson, J., 2016. Human brain networks function in connectome-  
579 specific harmonic waves. *Nat. Commun.* 7, 1–10. <https://doi.org/10.1038/ncomms10340>
- 580 Avants, B.B., Tustison, N.J., Song, G., Cook, P.A., Klein, A., Gee, J.C., 2011. A reproducible  
581 evaluation of ANTs similarity metric performance in brain image registration.  
582 *Neuroimage* 54, 2033–2044. <https://doi.org/10.1016/j.neuroimage.2010.09.025>
- 583 Baldassarre, A., Ramsey, L., Hacker, C.L., Callejas, A., Astafiev, S. V., Metcalf, N. V., Zinn,  
584 K., Rengachary, J., Snyder, A.Z., Carter, A.R., Shulman, G.L., Corbetta, M., 2014.  
585 Large-scale changes in network interactions as a physiological signature of spatial  
586 neglect. *Brain* 137, 3267–3283. <https://doi.org/10.1093/brain/awu297>
- 587 Bassett, D.S., Bullmore, E., 2006. Small-World Brain Networks. *Neurosci.* 12, 512–523.  
588 <https://doi.org/10.1177/1073858406293182>
- 589 Behzadi, Y., Restom, K., Liau, J., Liu, T.T., 2007. A component based noise correction  
590 method (CompCor) for BOLD and perfusion based fMRI. *Neuroimage* 37, 90–101.  
591 <https://doi.org/10.1016/j.neuroimage.2007.04.042>
- 592 Benjamini, Y., Hochberg, Y., 1995. Controlling the False Discovery Rate: a Practical and  
593 Powerful Approach to Multiple Testing. *J. R. Stat. Soc.* 57, 289–300.  
594 <https://doi.org/10.2307/2346101>
- 595 Bertolero, M.A., Yeo, B.T.T., Bassett, D.S., Esposito, M.D., 2018. A mechanistic model of  
596 connector hubs, modularity, and cognition. *arXiv* 1–37. [https://doi.org/10.1038/s41562-](https://doi.org/10.1038/s41562-018-0420-6)  
597 [018-0420-6](https://doi.org/10.1038/s41562-018-0420-6)
- 598 Carrera, E., Tononi, G., 2014. Diaschisis: past, present, future. *Brain* 137, 2408–22.  
599 <https://doi.org/10.1093/brain/awu101>
- 600 Carter, A.R., Astafiev, S. V, Lang, C.E., Connor, L.T., Rengachary, J., Strube, M.J., Pope,  
601 D.L.W., Shulman, G.L., Corbetta, M., 2010. Resting interhemispheric functional  
602 magnetic resonance imaging connectivity predicts performance after stroke. *Ann.*

603           Neurol. 67, 365–75. <https://doi.org/10.1002/ana.21905>

604   Cerliani, L., Thomas, R.M., Jbabdi, S., Siero, J.C.W., Nanetti, L., Crippa, A., Gazzola, V.,  
605           D’Arceuil, H., Keysers, C., 2012. Probabilistic tractography recovers a rostrocaudal  
606           trajectory of connectivity variability in the human insular cortex. *Hum. Brain Mapp.* 33,  
607           2005–2034. <https://doi.org/10.1002/hbm.21338>

608   Coifman, R.R., Lafon, S., 2006. Diffusion maps. *Appl. Comput. Harmon. Anal.* 21, 5–30.  
609           <https://doi.org/10.1016/j.acha.2006.04.006>

610   Cole, M.W., Bassett, D.S., Power, J.D., Braver, T.S., Petersen, S.E., 2014. Intrinsic and task-  
611           evoked network architectures of the human brain. *Neuron* 83, 238–251.  
612           <https://doi.org/10.1016/j.neuron.2014.05.014>

613   Corbetta, M., 2010. Functional connectivity and neurological recovery. *Dev. Psychobiol.* 54,  
614           239–53. <https://doi.org/10.1002/dev.20507>

615   Dale, A.M., Fischl, B., Sereno, M.I., 1999. Cortical Surface-Based Analysis. *Neuroimage* 9,  
616           179–194. <https://doi.org/10.1006/nimg.1998.0395>

617   Di Pino, G., Pellegrino, G., Assenza, G., Capone, F., Ferreri, F., Formica, D., Ranieri, F.,  
618           Tombini, M., Ziemann, U., Rothwell, J.C., Di Lazzaro, V., 2014. Modulation of brain  
619           plasticity in stroke: a novel model for neurorehabilitation. *Nat. Rev. Neurol.* 10, 597–  
620           608. <https://doi.org/10.1038/nrneurol.2014.162>

621   Dirnagl, U., Iadecola, C., Moskowitz, M.A., 1999. Pathobiology of ischaemic stroke : an  
622           integrated view 391–397.

623   Felleman, D.J., Van Essen, D.C., n.d. Distributed hierarchical processing in the primate  
624           cerebral cortex. *Cereb. Cortex* 1, 1–47.

625   Gorgolewski, K., Burns, C.D., Madison, C., Clark, D., Halchenko, Y.O., Waskom, M.L.,  
626           Ghosh, S.S., 2011. Nipype: A Flexible, Lightweight and Extensible Neuroimaging Data  
627           Processing Framework in Python. *Front. Neuroinform.* 5.  
628           <https://doi.org/10.3389/fninf.2011.00013>

629   Greve, D.N., Fischl, B., 2009. Accurate and robust brain image alignment using boundary-  
630           based registration. *Neuroimage* 48, 63–72.  
631           <https://doi.org/10.1016/j.neuroimage.2009.06.060>

632   Haak, K. V., Marquand, A.F., Beckmann, C.F., 2018. Connectopic mapping with resting-state  
633           fMRI. *Neuroimage* 170, 83–94. <https://doi.org/10.1016/j.neuroimage.2017.06.075>

634   He, B.J., Snyder, A.Z., Vincent, J.L., Epstein, A., Shulman, G.L., Corbetta, M., 2007.  
635           Breakdown of functional connectivity in frontoparietal networks underlies behavioral  
636           deficits in spatial neglect. *Neuron* 53, 905–18.

- 637 <https://doi.org/10.1016/j.neuron.2007.02.013>
- 638 Honey, C.J., Sporns, O., 2008. Dynamical consequences of lesions in cortical networks. *Hum.*  
639 *Brain Mapp.* 29, 802–9. <https://doi.org/10.1002/hbm.20579>
- 640 Hotter, B., Pittl, S., Ebinger, M., Oepen, G., Jegzentis, K., Kudo, K., Rozanski, M., Schmidt,  
641 W.U., Brunecker, P., Xu, C., Martus, P., Endres, M., Jungehülsing, G.J., Villringer, A.,  
642 Fiebach, J.B., 2009. Prospective study on the mismatch concept in acute stroke patients  
643 within the first 24 h after symptom onset - 1000Plus study. *BMC Neurol.* 9, 1–8.  
644 <https://doi.org/10.1186/1471-2377-9-60>
- 645 Huntenburg, J.M., Bazin, P.L., Margulies, D.S., 2018. Large-Scale Gradients in Human  
646 Cortical Organization. *Trends Cogn. Sci.* 22, 21–31.  
647 <https://doi.org/10.1016/j.tics.2017.11.002>
- 648 Jenkinson, M., Beckmann, C.F., Behrens, T.E.J., Woolrich, M.W., Smith, S.M., 2012. *Fsl.*  
649 *Neuroimage* 62, 782–790. <https://doi.org/10.1016/j.neuroimage.2011.09.015>
- 650 Khalil, A.A., Ostwaldt, A.C., Nierhaus, T., Ganeshan, R., Audebert, H.J., Villringer, K.,  
651 Villringer, A., Fiebach, J.B., 2017. Relationship between Changes in the Temporal  
652 Dynamics of the Blood-Oxygen-Level-Dependent Signal and Hypoperfusion in Acute  
653 Ischemic Stroke. *Stroke* 48, 925–931.  
654 <https://doi.org/10.1161/STROKEAHA.116.015566>
- 655 Krienen, F.M., Sherwood, C.C., 2017. Gradients of Connectivity in the Cerebral Cortex.  
656 *Trends Cogn. Sci.* 21, 61–63. <https://doi.org/10.1016/j.tics.2016.12.002>
- 657 Langs, G., Sweet, A., Lashkari, D., Tie, Y., Rigolo, L., Golby, A.J., Golland, P., 2014.  
658 Decoupling function and anatomy in atlases of functional connectivity patterns:  
659 Language mapping in tumor patients. *Neuroimage* 103, 462–475.  
660 <https://doi.org/10.1016/j.neuroimage.2014.08.029>
- 661 Langs, G., Wang, D., Golland, P., Mueller, S., Pan, R., Sabuncu, M.R., Sun, W., Li, K., Liu,  
662 H., 2016. Identifying Shared Brain Networks in Individuals by Decoupling Functional  
663 and Anatomical Variability. *Cereb. Cortex* 26, 4004–4014.  
664 <https://doi.org/10.1093/cercor/bhv189>
- 665 Lin, L.I., 2016. A Concordance Correlation Coefficient to Evaluate Reproducibility Author ( s  
666 ): Lawrence I-Kuei Lin Published by : International Biometric Society Stable URL :  
667 <http://www.jstor.org/stable/2532051> REFERENCES Linked references are available on  
668 JSTOR for thi 45, 255–268.
- 669 Lohmann, G., Ovadia-Caro, S., Jungehülsing, G.J., Margulies, D.S., Villringer, A., Turner,  
670 R., 2012. Connectivity concordance mapping: a new tool for model-free analysis of

- 671 FMRI data of the human brain. *Front. Syst. Neurosci.* 6, 13.  
672 <https://doi.org/10.3389/fnsys.2012.00013>
- 673 Lyden, P., 2017. Using the National Institutes of Health Stroke Scale. *Stroke* 48, 513–519.  
674 <https://doi.org/10.1161/STROKEAHA.116.015434>
- 675 Margulies, D.S., Ghosh, S.S., Goulas, A., Falkiewicz, M., Huntenburg, J.M., Langs, G.,  
676 Bezgin, G., Eickhoff, S.B., Castellanos, F.X., Petrides, M., Jefferies, E., Smallwood, J.,  
677 2016. Situating the default-mode network along a principal gradient of macroscale  
678 cortical organization. *Proc. Natl. Acad. Sci. U. S. A.* 113, 12574–12579.  
679 <https://doi.org/10.1073/pnas.1608282113>
- 680 Markov, N.T., Ercsey-Ravasz, M.M., Ribeiro Gomes, A.R., Lamy, C., Magrou, L., Vezoli, J.,  
681 Misery, P., Falchier, A., Quilodran, R., Gariel, M.A., Sallet, J., Gamanut, R., Huissoud,  
682 C., Clavagnier, S., Giroud, P., Sappey-Marinier, D., Barone, P., Dehay, C., Toroczkai,  
683 Z., Knoblauch, K., Van Essen, D.C., Kennedy, H., 2014. A Weighted and Directed  
684 Interareal Connectivity Matrix for Macaque Cerebral Cortex. *Cereb. Cortex* 24, 17–36.  
685 <https://doi.org/10.1093/cercor/bhs270>
- 686 Nomura, E.M., Gratton, C., Visser, R.M., Kayser, A., Perez, F., D’Esposito, M., 2010. Double  
687 dissociation of two cognitive control networks in patients with focal brain lesions. *Proc.*  
688 *Natl. Acad. Sci. U. S. A.* 107, 12017–22. <https://doi.org/10.1073/pnas.1002431107>
- 689 Ovadia-Caro, S., Margulies, D.S., Villringer, A., 2014. The value of resting-state functional  
690 magnetic resonance imaging in stroke. *Stroke.* 45, 2818–24.  
691 <https://doi.org/10.1161/STROKEAHA.114.003689>
- 692 Ovadia-Caro, S., Villringer, K., Fiebach, J., Jungehulsing, G.J., van der Meer, E., Margulies,  
693 D.S., Villringer, A., 2013. Longitudinal effects of lesions on functional networks after  
694 stroke. *J. Cereb. Blood Flow Metab.* 33, 1279–85. <https://doi.org/10.1038/jcbfm.2013.80>
- 695 Park, C., Chang, W.H., Ohn, S.H., Kim, S.T., Bang, O.Y., Pascual-Leone, A., Kim, Y.-H.,  
696 2011. Longitudinal changes of resting-state functional connectivity during motor  
697 recovery after stroke. *Stroke.* 42, 1357–62.  
698 <https://doi.org/10.1161/STROKEAHA.110.596155>
- 699 Ramsey, L.E., Siegel, J.S., Baldassarre, A., Metcalf, N. V., Zinn, K., Shulman, G.L., Corbetta,  
700 M., 2016. Normalization of network connectivity in hemispatial neglect recovery. *Ann.*  
701 *Neurol.* 80, 127–141. <https://doi.org/10.1002/ana.24690>
- 702 Roche, A., 2011. A four-dimensional registration algorithm with application to joint  
703 correction of motion and slice timing in fMRI. *IEEE Trans. Med. Imaging* 30, 1546–  
704 1554. <https://doi.org/10.1109/TMI.2011.2131152>



- 705 Sacco, R.L., Kasner, S.E., Broderick, J.P., Caplan, L.R., Connors, J.J., Culebras, A., Elkind,  
706 M.S.V., George, M.G., Hamdan, A.D., Higashida, R.T., Hoh, B.L., Janis, L.S., Kase,  
707 C.S., Kleindorfer, D.O., Lee, J.M., Moseley, M.E., Peterson, E.D., Turan, T.N.,  
708 Valderrama, A.L., Vinters, H. V., 2013. An updated definition of stroke for the 21st  
709 century: A statement for healthcare professionals from the American heart  
710 association/American stroke association. *Stroke* 44, 2064–2089.  
711 <https://doi.org/10.1161/STR.0b013e318296aeca>
- 712 Siegel, J.S., Ramsey, L.E., Snyder, A.Z., Metcalf, N. V., Chacko, R. V., Weinberger, K.,  
713 Baldassarre, A., Hacker, C.D., Shulman, G.L., Corbetta, M., 2016. Disruptions of  
714 network connectivity predict impairment in multiple behavioral domains after stroke.  
715 *Proc. Natl. Acad. Sci.* 113, E4367–E4376. <https://doi.org/10.1073/pnas.1521083113>
- 716 Siegel, J.S., Snyder, A.Z., Ramsey, L., Shulman, G.L., Corbetta, M., 2016. The effects of  
717 hemodynamic lag on functional connectivity and behavior after stroke. *J. Cereb. Blood*  
718 *Flow Metab.* 36, 2162–2176. <https://doi.org/10.1177/0271678X15614846>
- 719 Sporns, O., Tononi, G., Kötter, R., 2005. The human connectome: A structural description of  
720 the human brain. *PLoS Comput. Biol.* 1, e42.  
721 <https://doi.org/10.1371/journal.pcbi.0010042>
- 722 Thomas Yeo, B.T., Krienen, F.M., Sepulcre, J., Sabuncu, M.R., Lashkari, D., Hollinshead,  
723 M., Roffman, J.L., Smoller, J.W., Zollei, L., Polimeni, J.R., Fischl, B., Liu, H., Buckner,  
724 R.L., 2011. The organization of the human cerebral cortex estimated by intrinsic  
725 functional connectivity. *J. Neurophysiol.* 106, 1125–1165.  
726 <https://doi.org/10.1152/jn.00338.2011>
- 727 van Dellen, E., Hillebrand, A., Douw, L., Heimans, J.J., Reijneveld, J.C., Stam, C.J., 2013.  
728 Local polymorphic delta activity in cortical lesions causes global decreases in functional  
729 connectivity. *Neuroimage* 83, 524–532.  
730 <https://doi.org/10.1016/j.neuroimage.2013.06.009>
- 731 van den Heuvel, M.P., Sporns, O., 2013. Network hubs in the human brain. *Trends Cogn. Sci.*  
732 17, 683–696. <https://doi.org/10.1016/j.tics.2013.09.012>
- 733 van Meer, M.P. a, van der Marel, K., Wang, K., Otte, W.M., El Bouazati, S., Roeling, T. a P.,  
734 Viergever, M. a, Berkelbach van der Sprenkel, J.W., Dijkhuizen, R.M., 2010. Recovery  
735 of sensorimotor function after experimental stroke correlates with restoration of resting-  
736 state interhemispheric functional connectivity. *J. Neurosci.* 30, 3964–72.  
737 <https://doi.org/10.1523/JNEUROSCI.5709-09.2010>
- 738 Volz, L.J., Rehme, A.K., Michely, J., Nettekoven, C., Eickhoff, S.B., Fink, G.R., Grefkes, C.,

- 739           2016. Shaping Early Reorganization of Neural Networks Promotes Motor Function after  
740           Stroke. *Cereb. Cortex* 26, 2882–2894. <https://doi.org/10.1093/cercor/bhw034>
- 741   Wahlund, L.O., Barkhof, F., Fazekas, F., Bronge, L., Augustin, M., 2001. A New Rating  
742           Scale for Age-Related White Matter Changes Applicable to MRI and CT 1318–1323.
- 743   Wang, L., Yu, C., Chen, H., Qin, W., He, Y., Fan, F., Zhang, Y., Wang, M., Li, K., Zang, Y.,  
744           Woodward, T.S., Zhu, C., 2010. Dynamic functional reorganization of the motor  
745           execution network after stroke. *Brain* 133, 1224–38.  
746           <https://doi.org/10.1093/brain/awq043>
- 747   Ward, N.S., 2005. Plasticity and the functional reorganization of the human brain. *Int. J.*  
748           *Psychophysiol.* 58, 158–61. <https://doi.org/10.1016/j.ijpsycho.2005.02.009>
- 749   Warren, J.E., Crinion, J.T., Lambon Ralph, M. a, Wise, R.J.S., 2009. Anterior temporal lobe  
750           connectivity correlates with functional outcome after aphasic stroke. *Brain* 132, 3428–  
751           42. <https://doi.org/10.1093/brain/awp270>
- 752   Woolrich, M.W., Jbabdi, S., Patenaude, B., Chappell, M., Makni, S., Behrens, T., Beckmann,  
753           C., Jenkinson, M., Smith, S.M., 2009. Bayesian analysis of neuroimaging data in FSL.  
754           *Neuroimage* 45, S173–S186. <https://doi.org/10.1016/j.neuroimage.2008.10.055>
- 755   Young, M.P., Hilgetag, C.-C., Scannell, J.W., 2000. On imputing function to structure from  
756           the behavioural effects of brain lesions. *Philos. Trans. R. Soc. B Biol. Sci.* 355, 147–161.  
757           <https://doi.org/10.1098/rstb.2000.0555>
- 758   Yushkevich, P.A., Piven, J., Hazlett, H.C., Smith, R.G., Ho, S., Gee, J.C., Gerig, G., 2006.  
759           User-guided 3D active contour segmentation of anatomical structures: Significantly  
760           improved efficiency and reliability. *Neuroimage* 31, 1116–1128.  
761           <https://doi.org/10.1016/j.neuroimage.2006.01.015>
- 762
